# Supplementary material for: Variability of fluorescence intensity distribution measured by flow cytometry is influenced by cell size and cell cycle progression
Source: PubMed Central journal article supplement (PMC10039904; doi:10.1038/s41598-023-31990-1), 2023-03-25

Background fluorescence → Low High  
DNA content

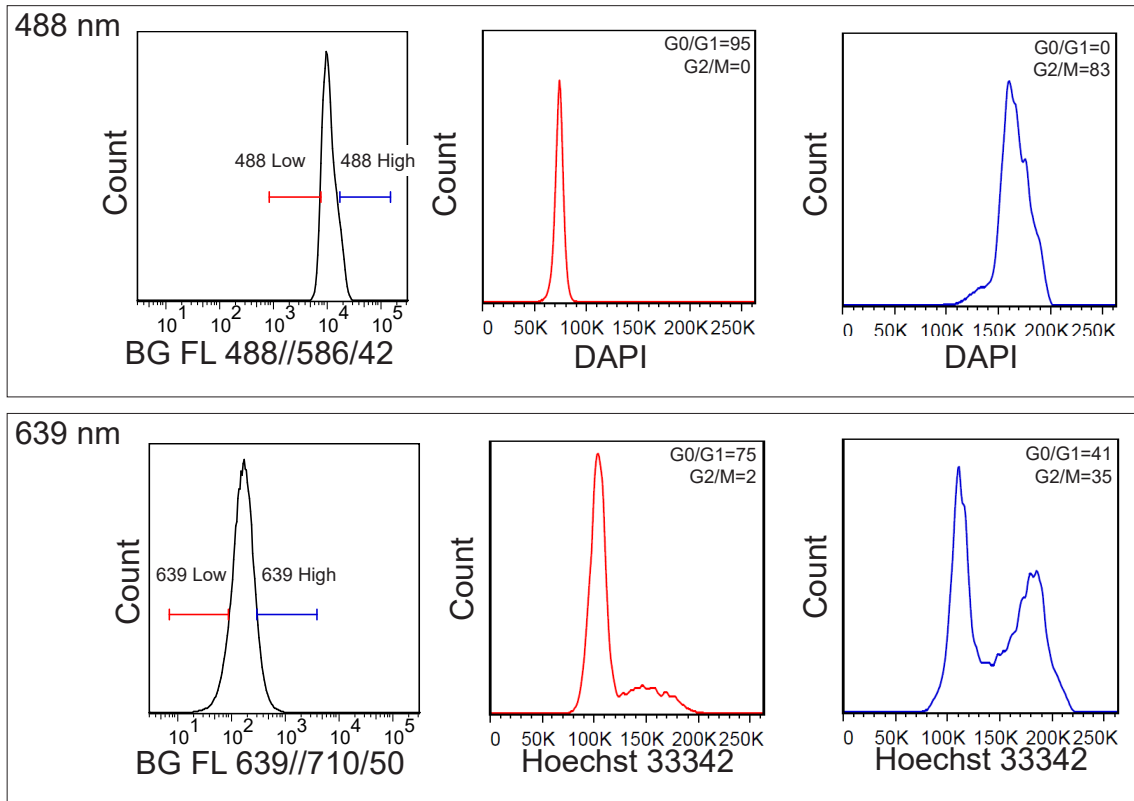

Post sorting

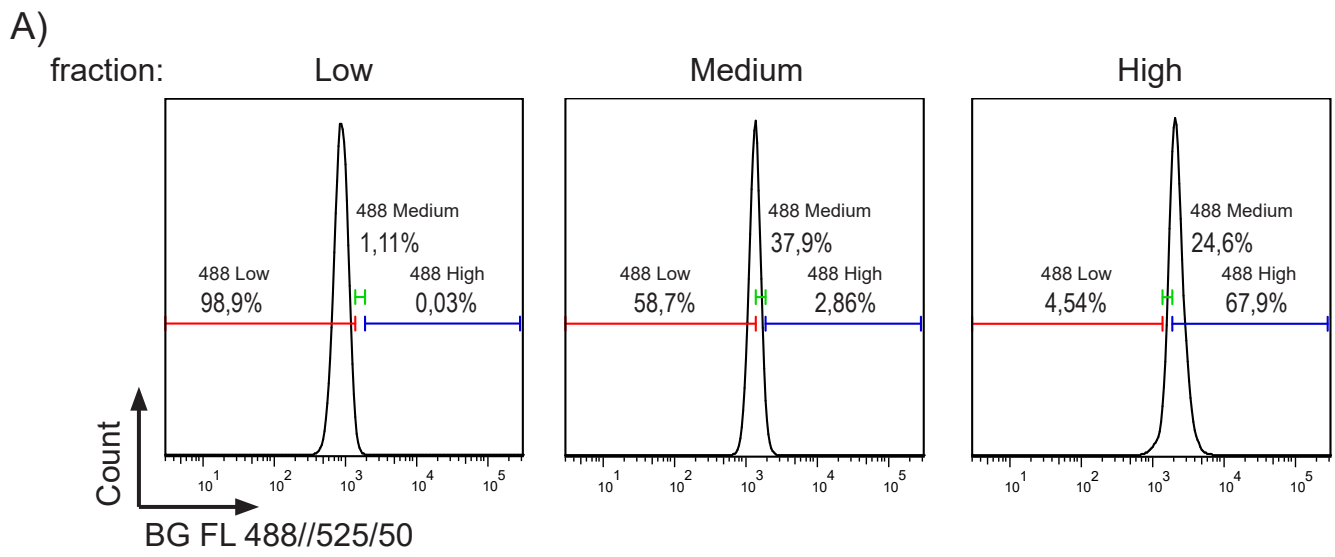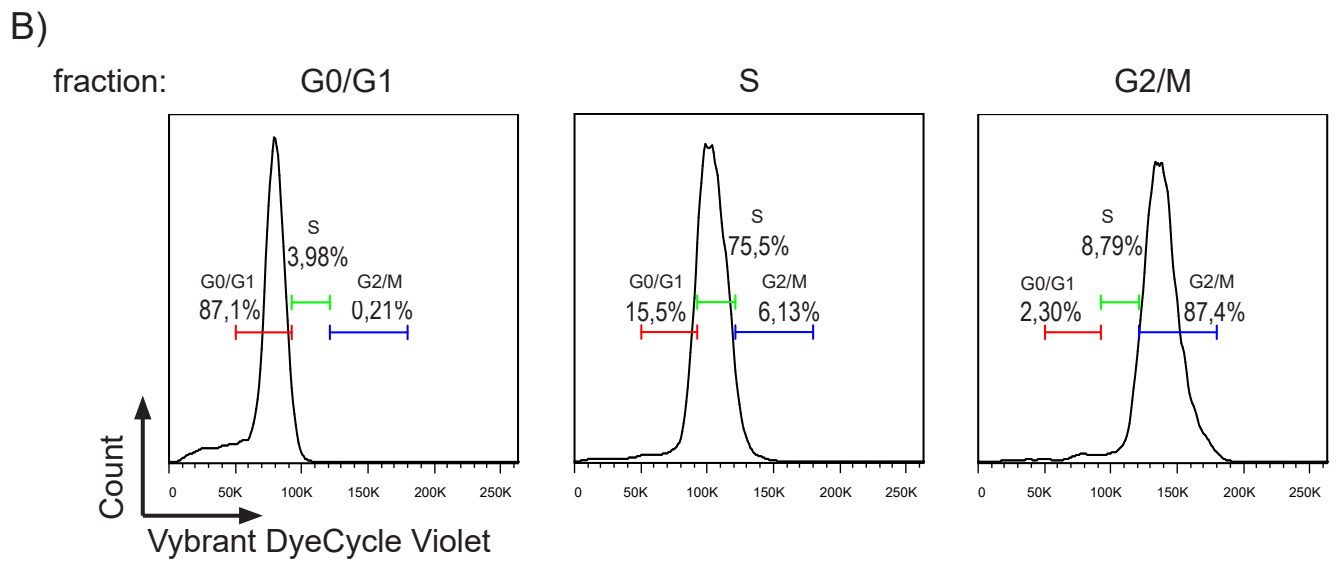

A)

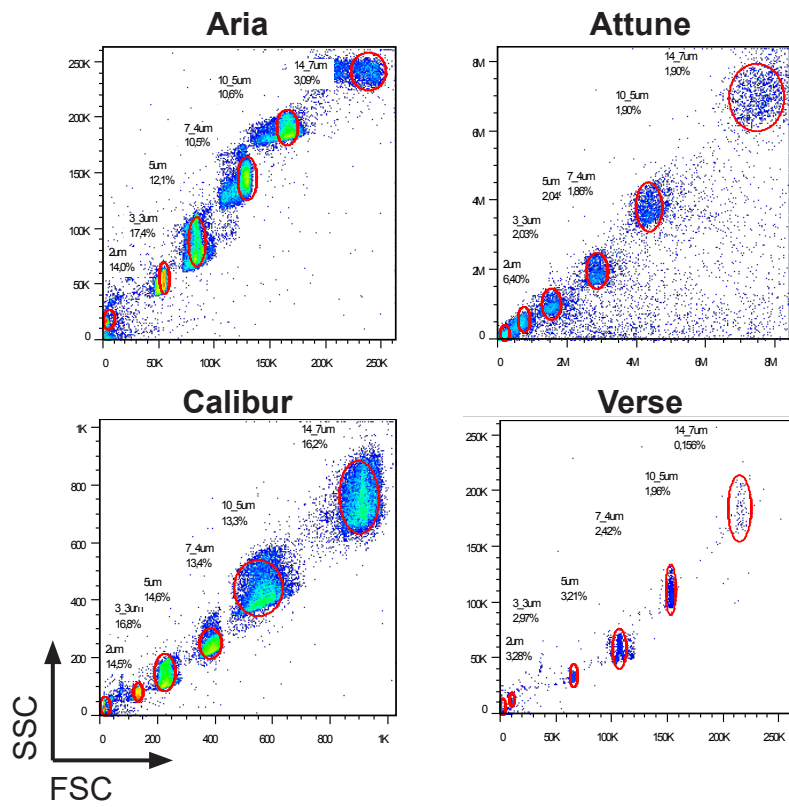

B)

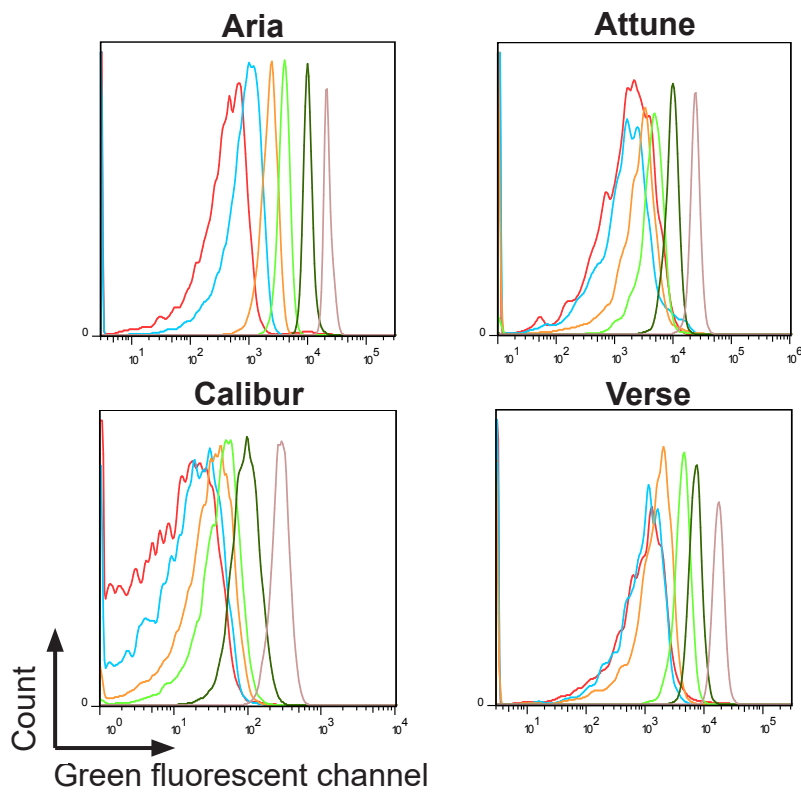

C)

| Population name | Median of green fluorescent channel |        |         |       |
|-----------------|-------------------------------------|--------|---------|-------|
|                 | Aria                                | Attune | Calibur | Verse |
| 14.7 μm         | 21300                               | 23900  | 275.0   | 17500 |
| 10.5 μm         | 9902                                | 9688   | 92.9    | 7075  |
| 7.4 μm          | 3943                                | 4471   | 44.3    | 4340  |
| 5.0 μm          | 2248                                | 2558   | 30.8    | 1467  |
| 3.3 μm          | 804                                 | 981    | 16.6    | 763   |
| 2.0 μm          | 296                                 | 369    | 8.51    | 614   |

Supplementary Figure 3

A)

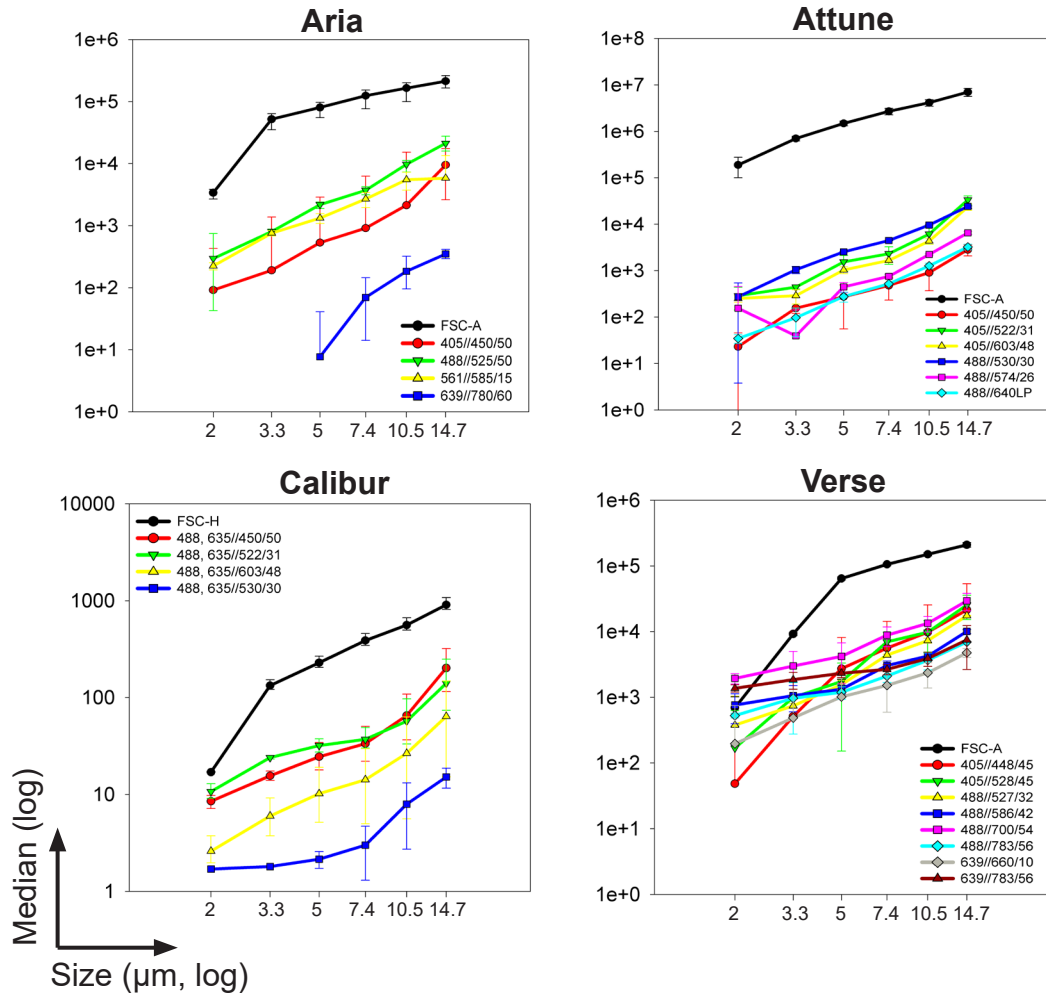

B)

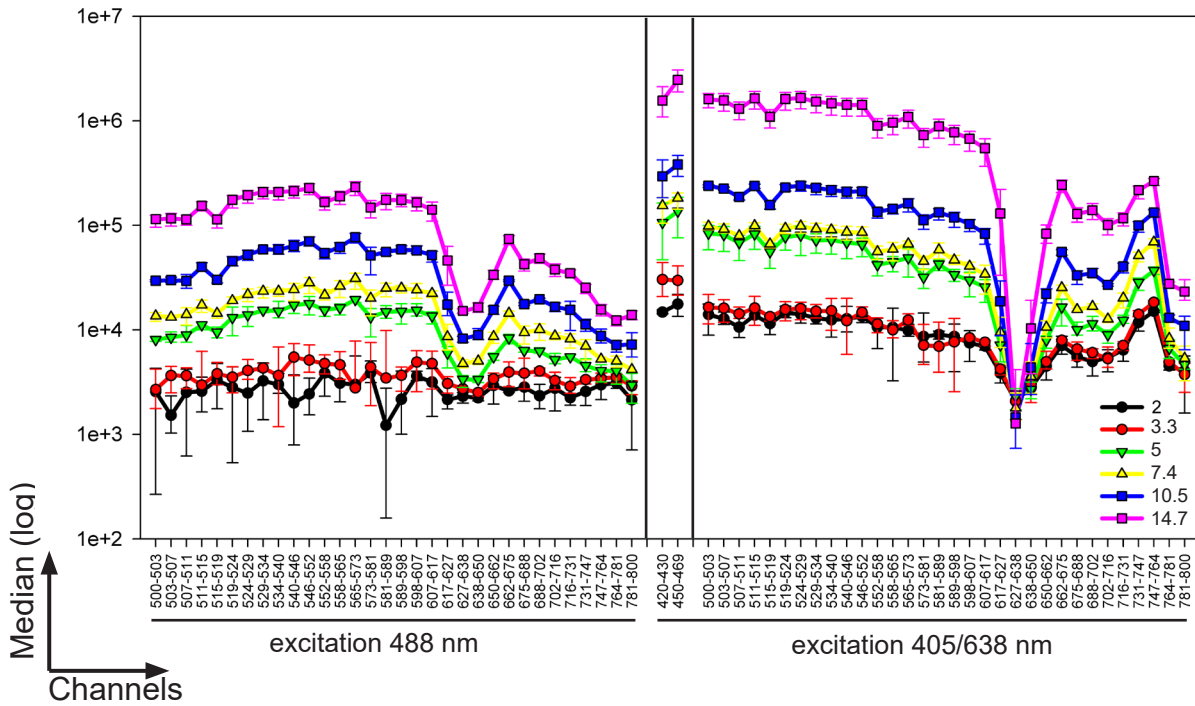

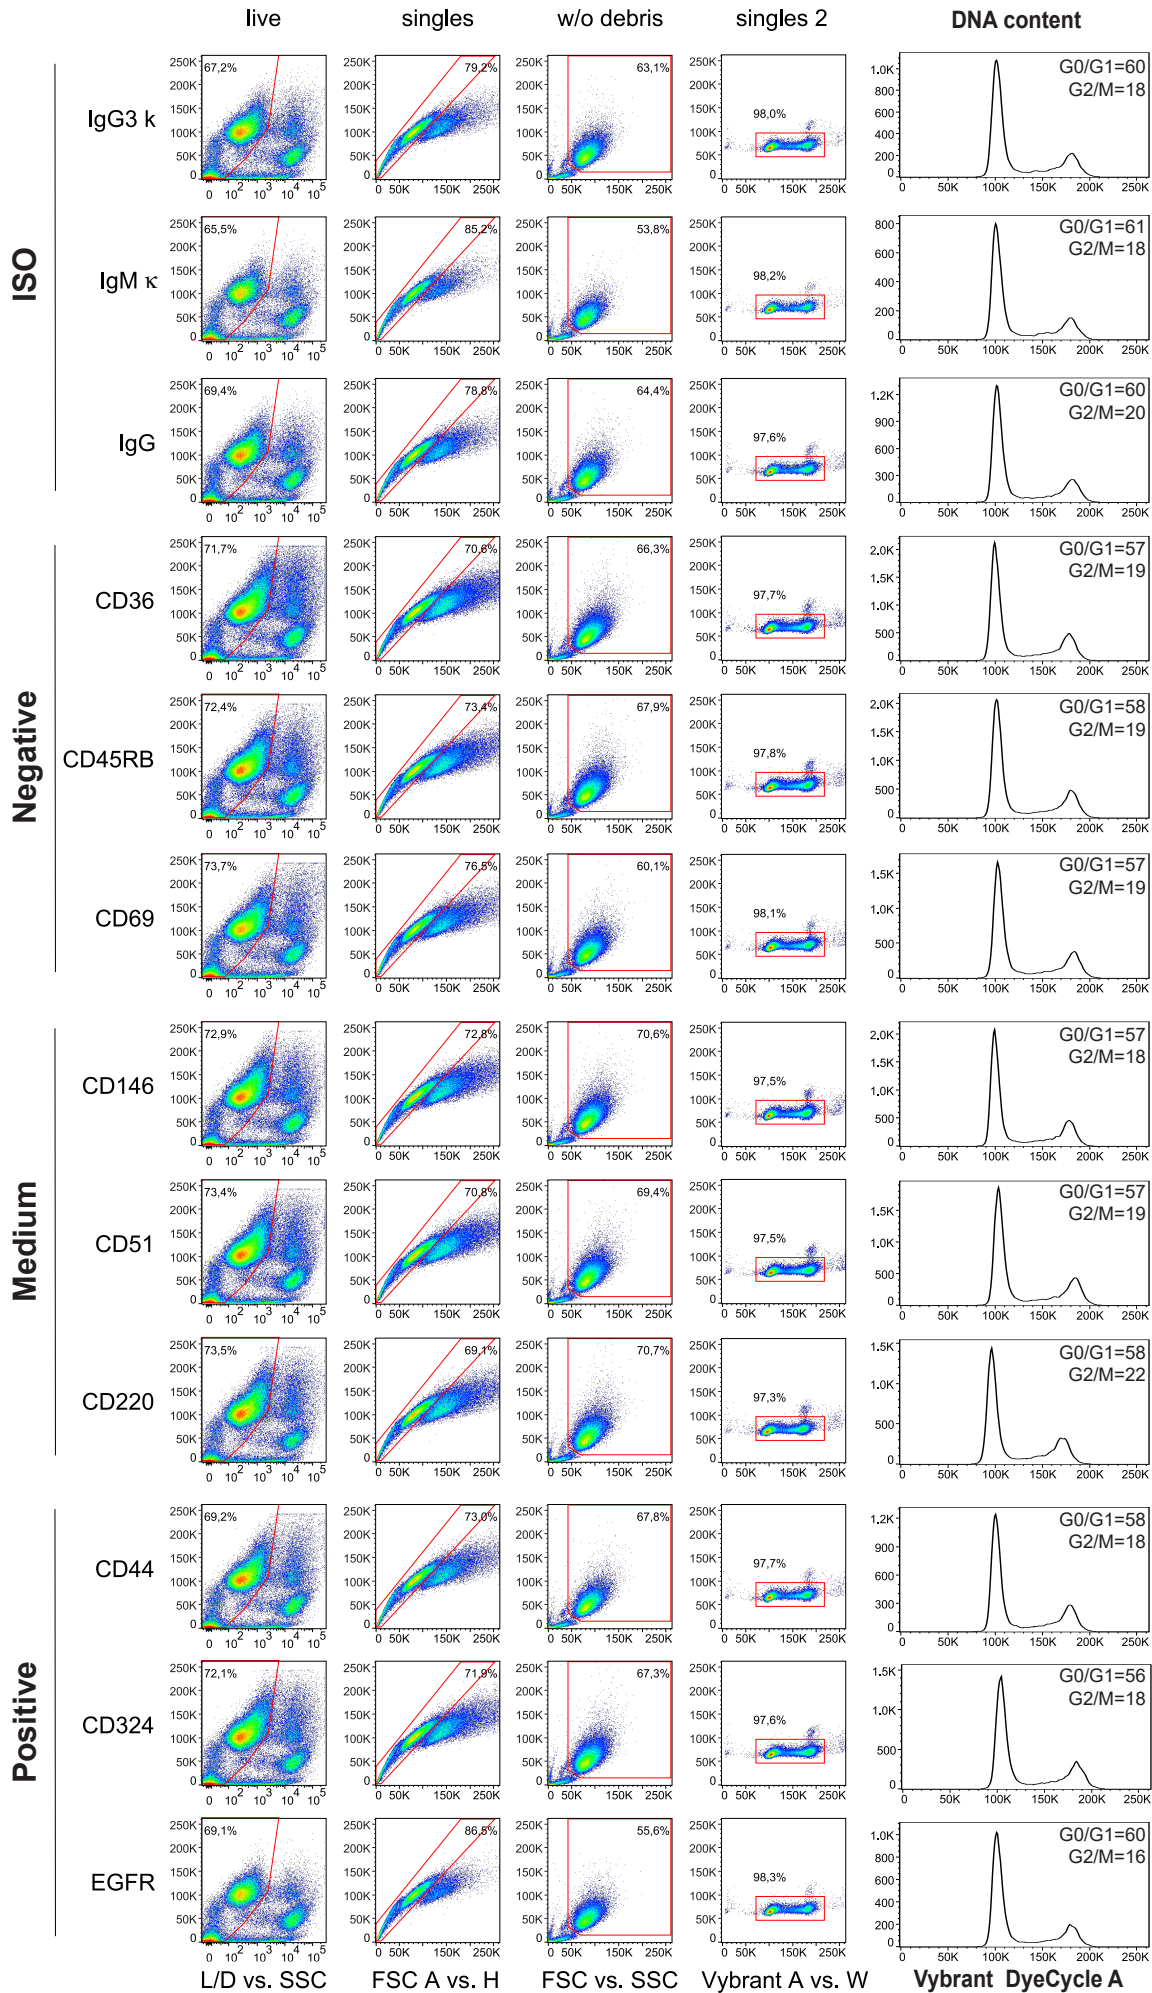

Supplementary Figure 5

Post sorting

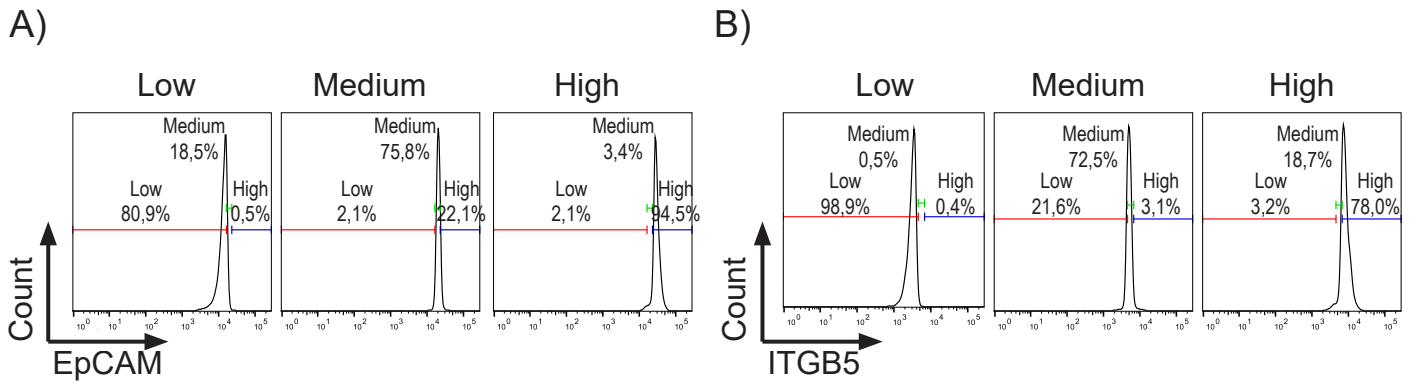

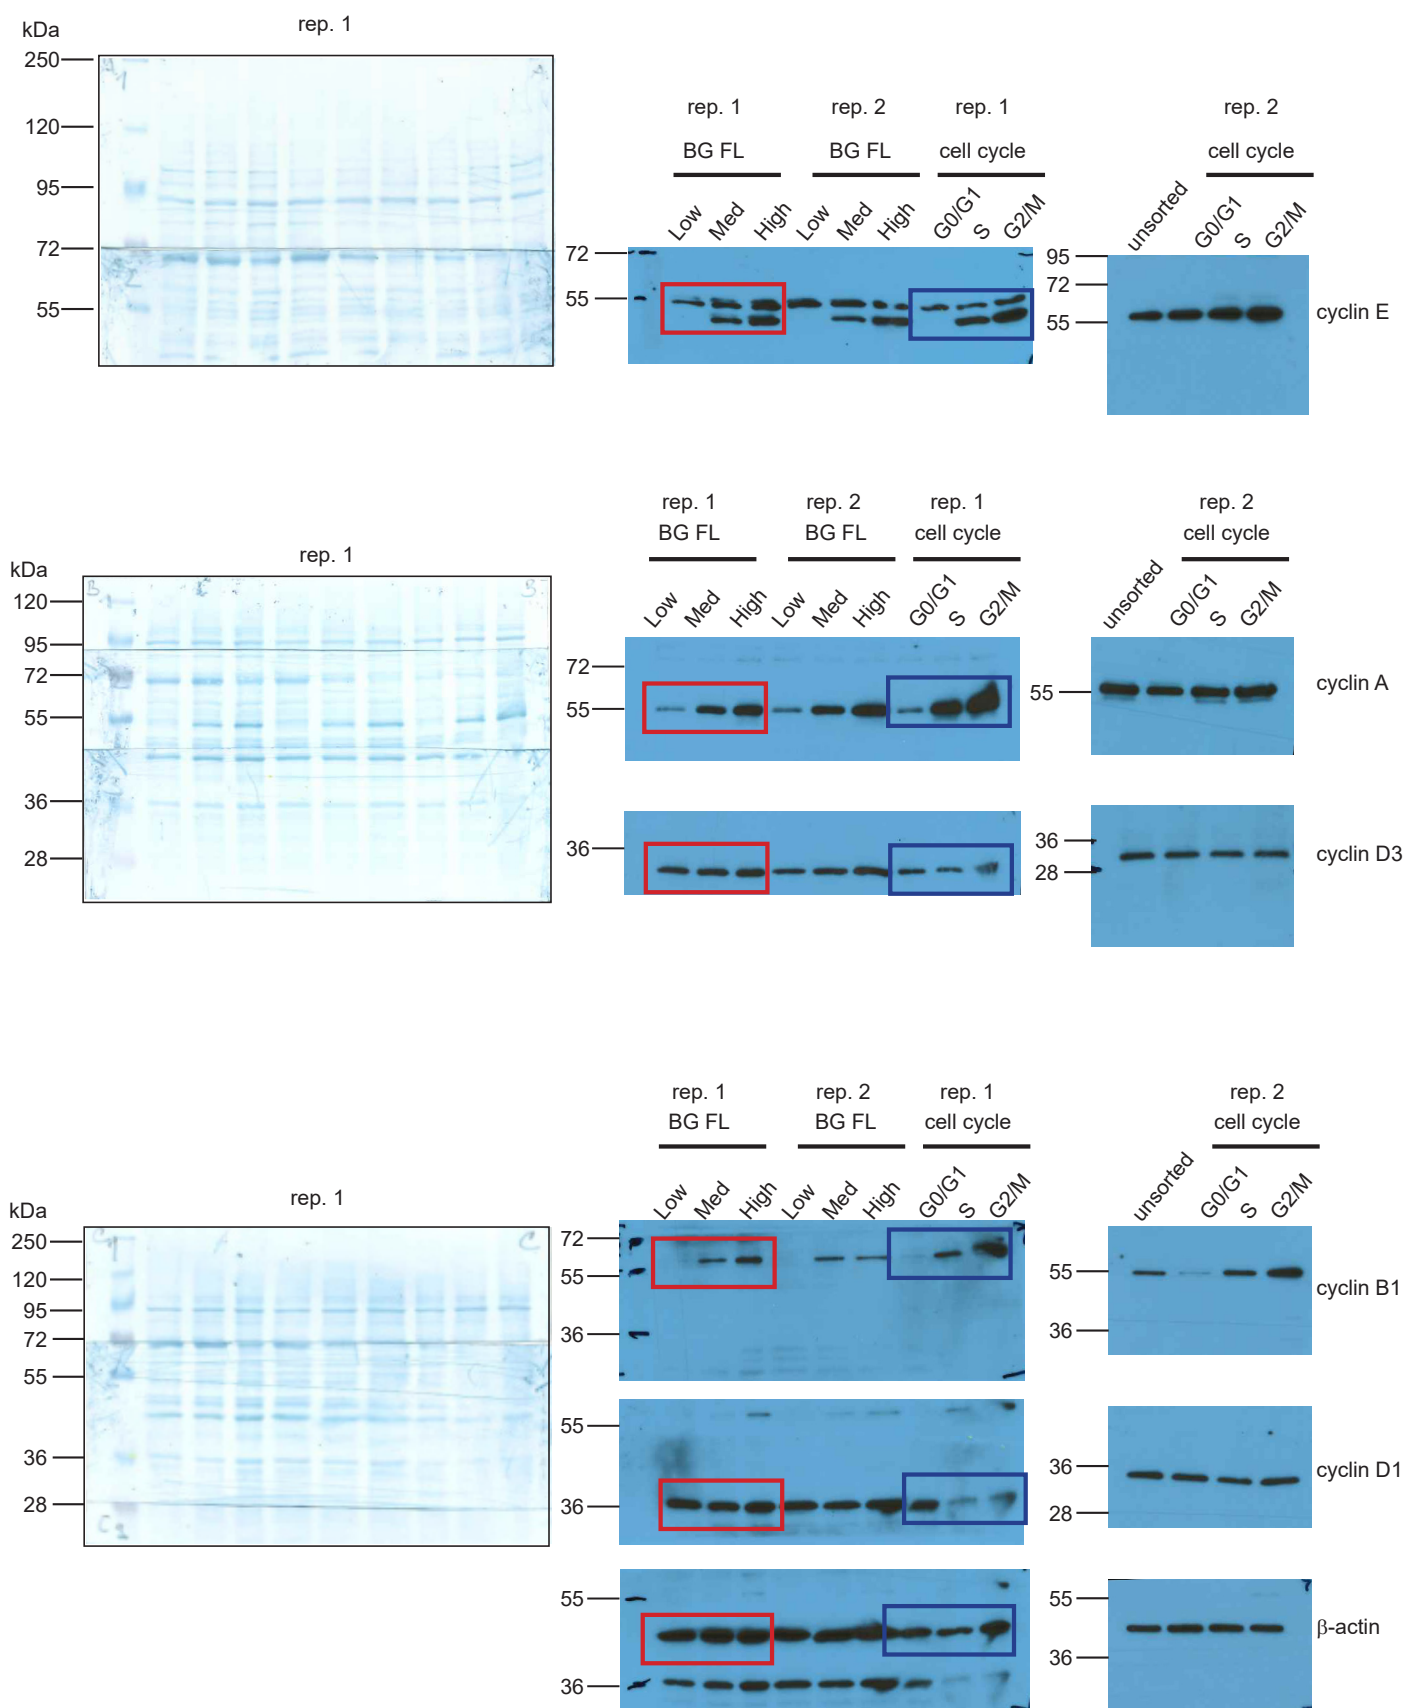

Supplementary Figure 7

A)

DNA content

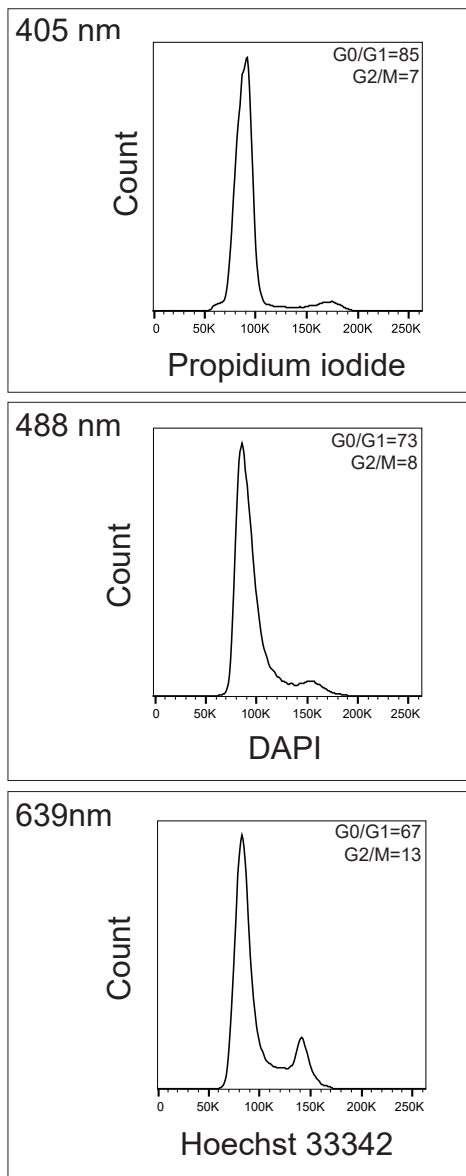

B)

DNA content

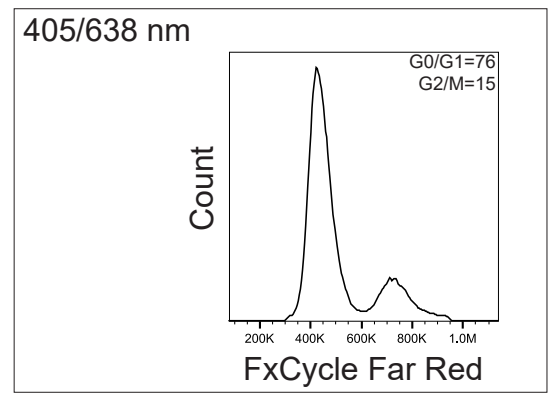

Supplement: 41598_2023_31990_MOESM2_ESM.pdf [file 41598_2023_31990_MOESM2_ESM.pdf]
